# Supplementary material for: Dynamics of Low-Level Viremia and Immune Activation after Switching to a Darunavir-Based Regimen
Source: MDPI journal article supplement (doi:10.3390/v16020182), 2024-01-25
Supplement: s1 [file s1]

| subtype | name             | sequence                                               | position relative to HXB2 |
|---------|------------------|--------------------------------------------------------|---------------------------|
| B       | msRNA Tat 1.4    | 5' TGGCAGGAAGAAGCGGAGA 3'                              | 5971-5989                 |
|         | msRNA-B-FAM/ZEN  | 5'-56-FAM/TTCCTTCGG/ZEN/GCCTGTCGGGT/3IAKbFQ/-3'        | 8402-8421                 |
|         | msRNA-B-rev      | 5' GGATCTGTCTCTGTCTCTCTCCACC 3'                        | 8433-8459                 |
| C       | msRNA C forw-2c  | 5' GCAGTRAGGATCATCAARATCYTRTATCAAAGC 3'                | 6012-6044                 |
|         | msRNA -C-FAM/ZEN | 5' -/56-FAM/CTTCTTCGA/ZEN/TTCYTCCGRGCCTGTC/3IABkFQ/-3' | 8406-8430                 |
|         | msRNA -C-rev     | 5'GATCTGYCTYTGTCTTGCTCTCCACCT3'                        | 8432-8458                 |
