# Supplementary material for: Dynamics of Low-Level Viremia and Immune Activation after Switching to a Darunavir-Based Regimen
Source: MDPI journal article supplement (doi:10.3390/v16020182), 2024-01-25
Supplement: s1 [file s1]

**Supplementary S5: HIV-RNA in CSF – Plasma**

| Subject ID | Baseline<br>(plasma) | Baseline<br>(CSF) | Week 24<br>(plasma) | Week 24<br>(CSF) |
|------------|----------------------|-------------------|---------------------|------------------|
| L-15       | <40 cp/mL            | 0 cp/mL (TND)     | <40 cp/mL           | n.a.             |
| L-28       | 58 cp/mL             | <50 cp/mL         | 135 cp/mL           | 0 cp/mL (TND)    |

*n.a.* = not available; *TND* = Target not detected; *CSF* = cerebrospinal fluid
