# Supplementary material for: Dynamics of Low-Level Viremia and Immune Activation after Switching to a Darunavir-Based Regimen
Source: Viruses. 2024 Jan 25;16(2):182. doi: 10.3390/v16020182 (PMC10893305; doi:10.3390/v16020182)
Supplement: Supplementary file 1 [file viruses-16-00182-s001.zip]

Archive with 6 entries (6 files):
- Supplementary S1_msRNA primers and probes_def.pdf
- Supplementary S2_Pharmacology.pdf
- Supplementary S3a_soluble markers.pdf
- Supplementary S3b_soluble markers.pdf
- Supplementary S4_cell assiociated markers.pdf
- Supplementary S5_CSF-Plasma.pdf
