# Supplementary figures and images for: Dynamics of Low-Level Viremia and Immune Activation after Switching to a Darunavir-Based Regimen
Source: MDPI journal article supplement (doi:10.3390/v16020182), 2024-01-25

**sICAM (log)**

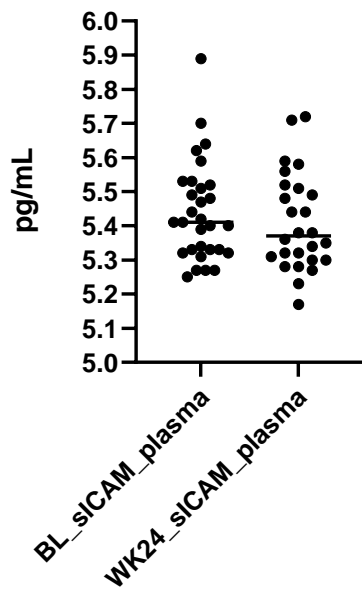

**sCD14 (log)**

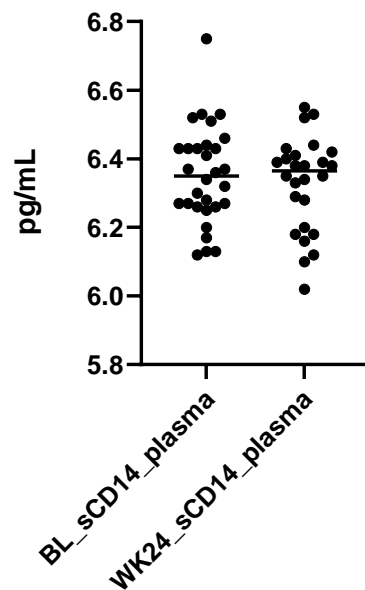

**sCD163**

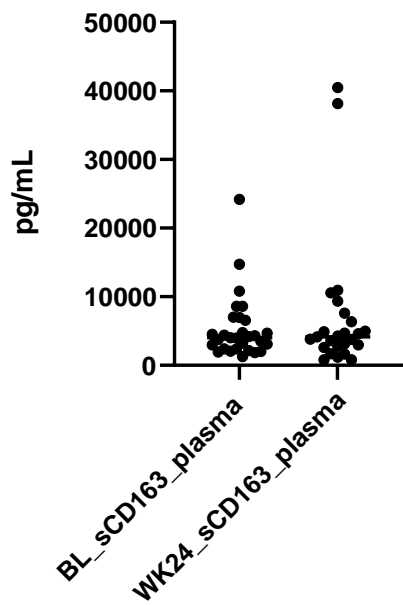

**MIG**

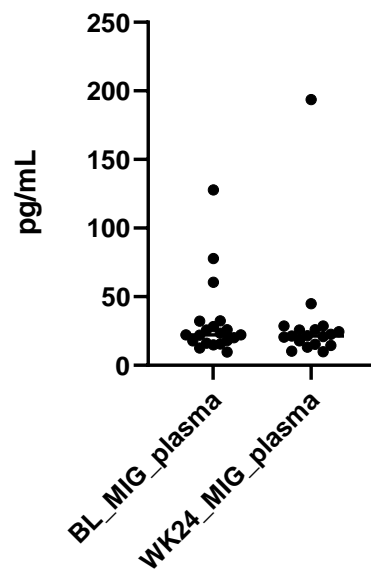

Supplement: s1 [file s1]

**IL-1b**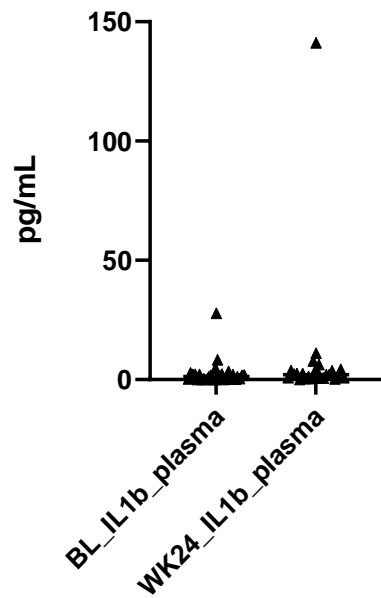**IL-6**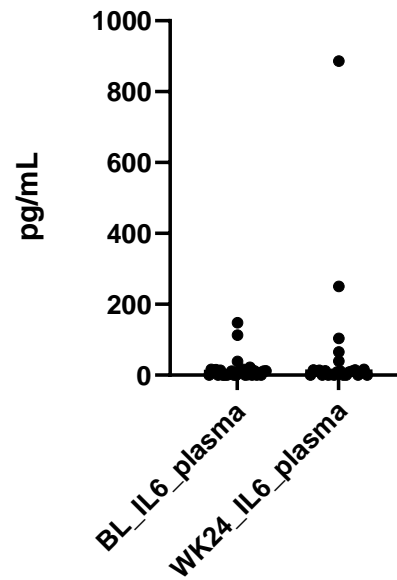**MIP-1a**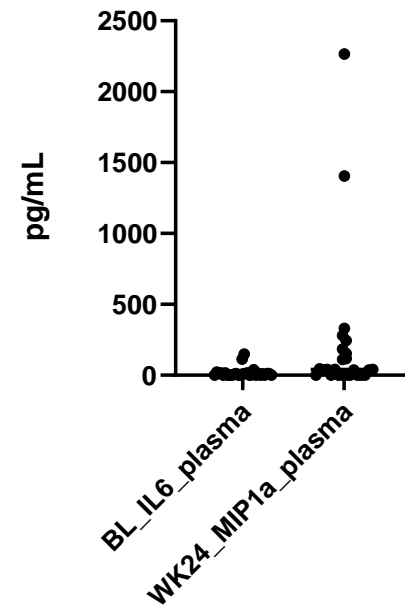**MIP1b**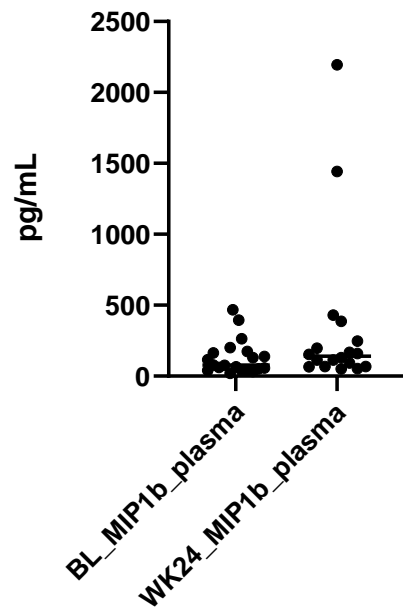**MCP1**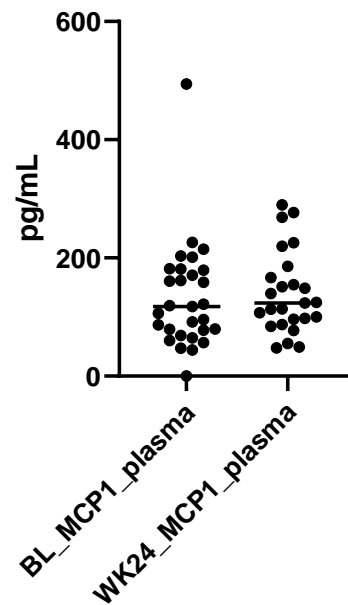**IP-10**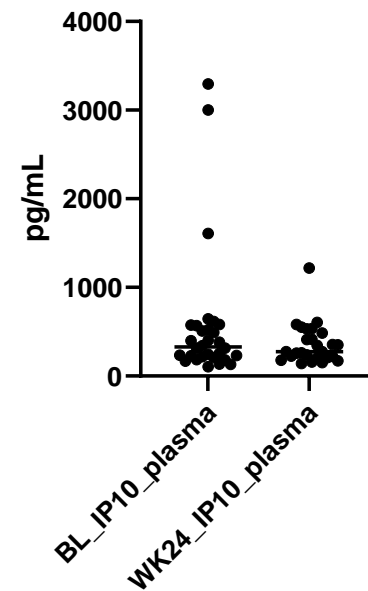

Supplement: s1 [file s1]

**CD4+CD38+HLA-DR+ (total)**

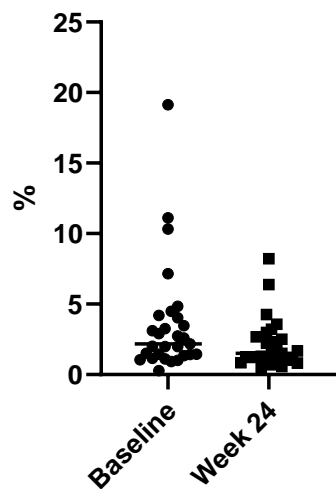

**CD4+CD38+HLA-DR+ (memory)**

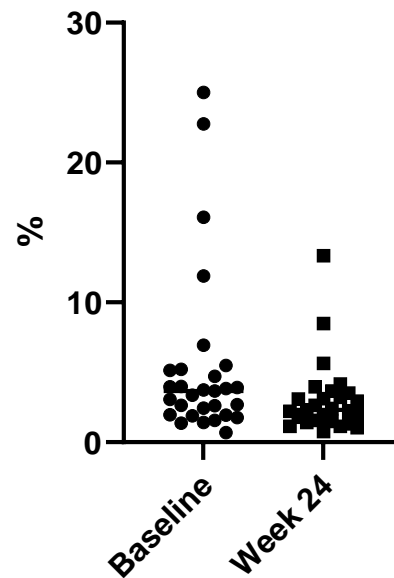

**CD8+CD38+HLA-DR+ (total)**

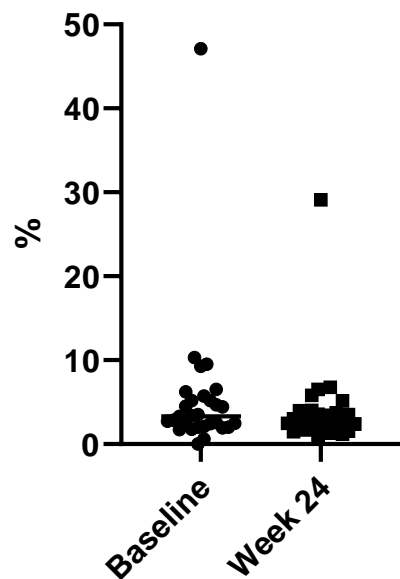

**CD8+CD38+HLA-DR+ (memory)**

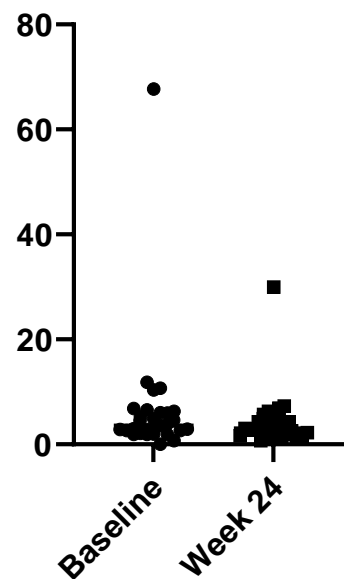

Supplement: s1 [file s1]
